1 **Title:** mtDNACombine: tools to combine sequences from multiple studies

2 **Authors:** Eleanor F. Miller\*<sup>a</sup>, Andrea Manica<sup>a</sup>

3 **Affiliations:**

4 <sup>a</sup> Department of Zoology, University of Cambridge, Downing street, Cambridge, CB2 3EJ, UK.

5 \* Corresponding Author: Eleanor F. Miller, Department of Zoology, University of Cambridge, Downing  
6 street, Cambridge, CB2 3EJ, UK. Email: [em618@cam.ac.uk](mailto:em618@cam.ac.uk)

7 **ORCID:**

8 EFM: 0000-0002-3213-5714

9 AM: 0000-0003-1895-450X

10 **Abstract:**

11 Today an unprecedented amount of genetic sequence data is stored in publicly available repositories.  
12 For decades now, mitochondrial DNA (mtDNA) has been the workhorse of genetic studies, and as a  
13 result, there is a large volume of mtDNA data available in these repositories for a wide range of  
14 species. Indeed, whilst whole genome sequencing is an exciting prospect for the future, for most  
15 non-model organisms' classical markers such as mtDNA remain widely used. By compiling existing  
16 data from multiple original studies, it is possible to build powerful new datasets capable of exploring  
17 many questions in ecology, evolution and conservation biology. One key question that these data  
18 can help inform is what happened in a species' demographic past. However, compiling data in this  
19 manner is not trivial, there are many complexities associated with data extraction, data quality and  
20 data handling. Here we present the mtDNAcombine package, a collection of tools developed to  
21 manage some of the major decisions associated with handling multi-study sequence data with a  
22 particular focus on preparing mtDNA data for Bayesian Skyline Plot demographic reconstructions.

23 **Key words:** demographic history, R package, mitochondrial DNA, public datasets, Bayesian skyline  
24 plots

25 **Introduction:**

26 Understanding a species' demographic past can help inform many questions in ecology, evolution  
27 and conservation biology. Consequently, there is a lot of interest in methods that are able to infer  
28 how a population's size may have changed through time. Traditional methods relied on insight from  
29 the fossil record [1–3]. However, although fossils are informative about many species, including our  
30 own, they remain a limited resource with coarse geographic and temporal resolution. In contrast,  
31 genetic methods have the potential to offer better resolution and are now established as the primary  
32 means by which a population's past can be interrogated.

33

34 Mitochondrial DNA (mtDNA) has been used widely for demographic reconstruction. The haploid  
35 nature of mtDNA along with its rapid rate evolution [4], lack of recombination [5] and uniparental  
36 mode of inheritance [6] make it more sensitive to capture changes in population size than slower  
37 evolving nuclear genes [7] (Fig. 1). MtDNA therefore has the temporal resolution to capture the  
38 impacts of relatively recent events that might be of interest, such as the Last Glacial Maximum  
39 (LGM). In combination with coalescent-based reconstruction methods such as Bayesian Skyline Plots  
40 (BSPs) [8], mtDNA can be used to estimate a detailed population profile that stretches back tens, or  
41 even hundreds, of thousands of years. On the negative side, since the mtDNA genome does not  
42 recombine, it acts as a single locus and thus is subject to high levels of stochasticity, necessitating  
43 larger sample sizes of individuals than if multi-locus data were available.

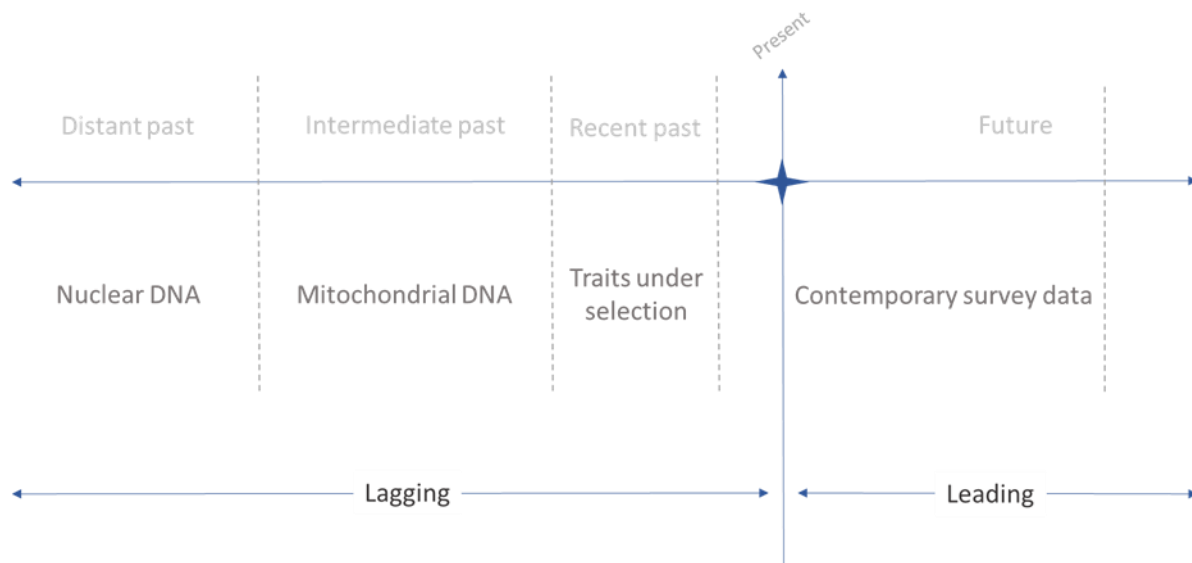

Adapted from Zink and Barrowclough, 2008. *Mitochondrial DNA under siege in avian phylogeography*

**Figure 1.** Utility of different loci for reconstructing different periods of population history.

44 With the falling costs of whole genome sequencing (WGS) and the growing interest in large scale  
45 sequencing projects, such as the Bird 10,000 Genomes Project (B10K) [9], the availability of WGS data  
46 is rapidly increasing. Using a single, high quality, diploid genome sequence, the pairwise sequentially  
47 Markovian coalescent (PSMC) method [10] can reconstruct a profile of population size through time  
48 for that species. However, PSMC is limited in its ability to capture details of population history more  
49 recently than ~1,000 generations ago [11]. The multiple sequential Markovian coalescent (MSMC), a  
50 method that builds on the PSMC framework, somewhat resolves this issue, using data from multiple  
51 individuals to improve the resolution of PSMC by an order of magnitude to more recent times [11].  
52 However, this method is costly, requiring multiple, phased, high-quality genomes from the species of  
53 interest. Whilst phasing data may get easier as average sequenced read lengths increase, this is still  
54 a non-trivial step and phased data is frequently too difficult or costly to obtain for non-model  
55 species.

56

57 Whilst WGS is an exciting prospect for the future, for most non-model organisms' classical markers  
58 such as mtDNA remain widely used [12]. Indeed, the falling costs of high throughput DNA  
59 sequencing, coupled with routine deposition of project data into public databases such as the  
60 National Centre for Biotechnology Information's (NCBI) GenBank [13], has created a burgeoning  
61 resource of mtDNA sequence data. For the first time, these databases contain sufficient sequence  
62 data to allow users to build quality meta-datasets. Although individual studies may only be able to  
63 undertake spatially and temporally restricted sampling efforts, by creatively using pre-existing  
64 resources from multiple studies, it is now feasible to improve sampling strategy, range coverage and  
65 sample sizes without additional sampling. As the workhorse of population genetics studies for many  
66 decades, public domain mtDNA data are available in large numbers for a wide range of species across  
67 most higher taxa.

68

69 Although sequence databases are normally curated, data input is generally not standardised or error  
70 checked. Studies differ greatly in the length and identity of target sequence, the quality of sequence  
71 curation and, while some studies upload all sequences obtained, others merely upload unique  
72 haplotypes. There are also instances of incorrect sample assignment. Altogether, this means that to  
73 compile a comparable set of sequences from multiple studies requires extensive data processing. In  
74 the current paper, we consider the practicalities and problems faced by a meta-analysis of publicly  
75 available data and present the mtDNAcombine package. The mtDNAcombine package is a collection  
76 of tools developed to manage some of the major decisions associated with handling multi-study  
77 sequence data with a particular focus on preparing mtDNA data for BSP population demographic  
78 reconstructions (Fig. 2.).

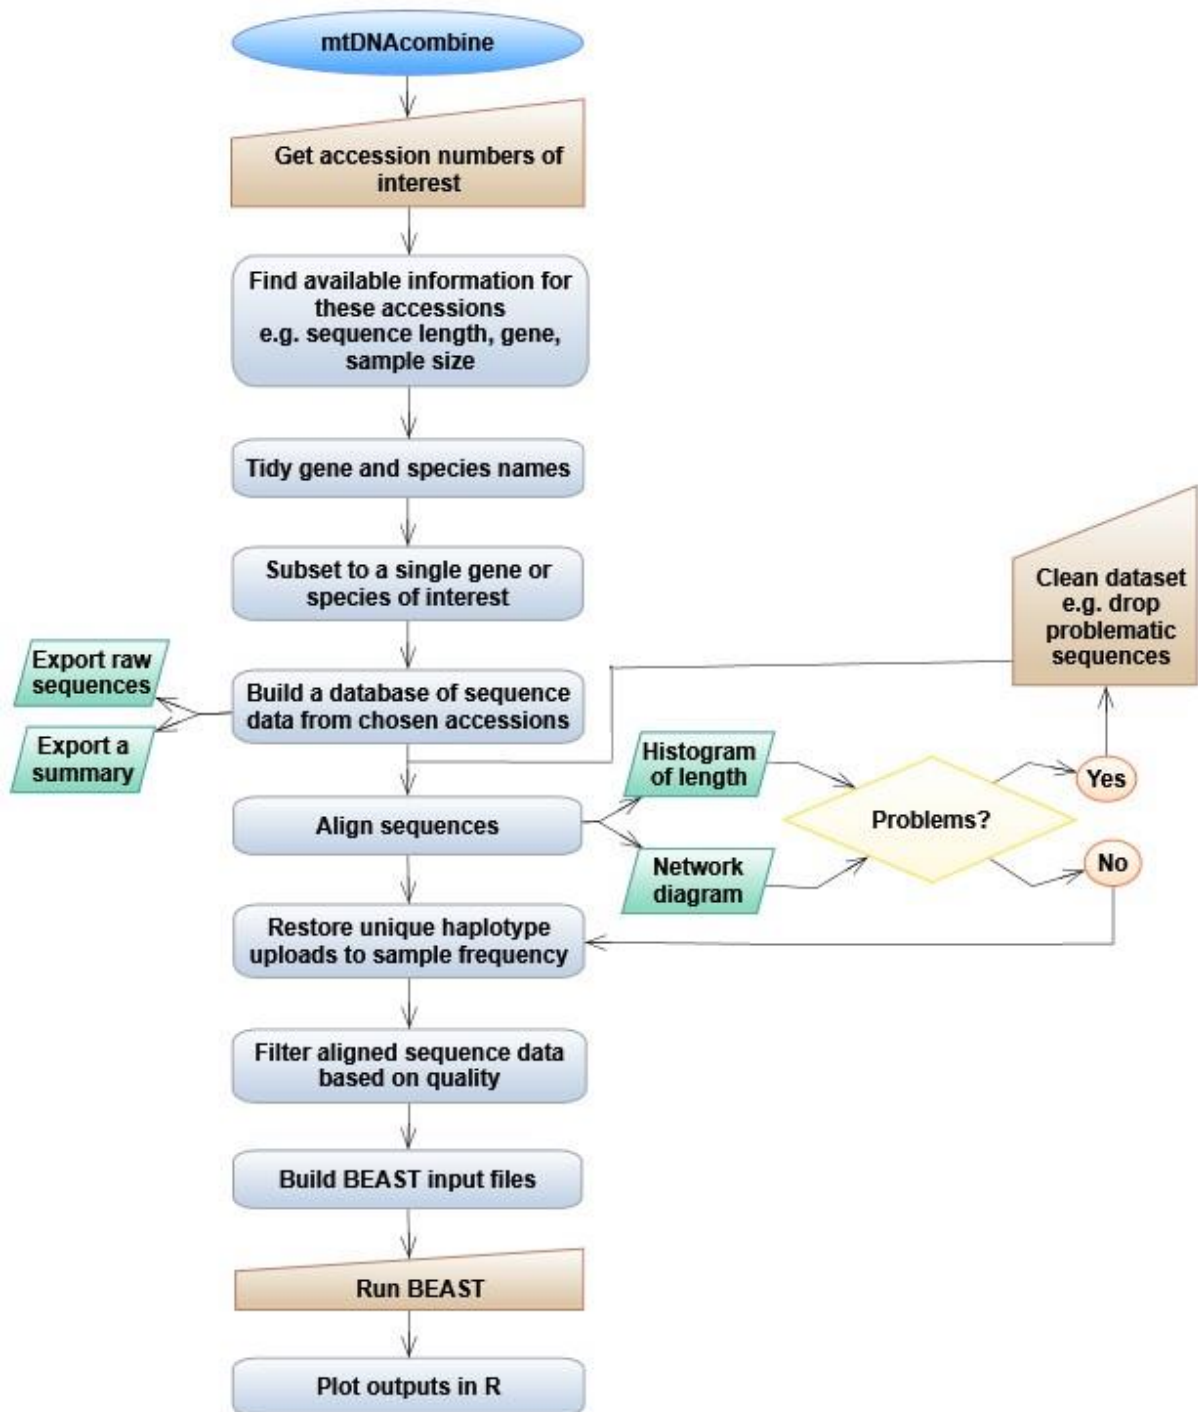

**Figure 2.** Flow diagram of mtDNAcombine pipeline showing decisions and steps supported by the package.

79 **Methods:**

80 **Data preparation**

81 **Raw data** – Step one is to search annotated DNA databases to determine how many data sets are  
82 available. We focus on GenBank, which is the main public repository for mtDNA datasets. Their  
83 website is intuitive, and it is easy to set up a search for a given taxon. In mtDNAcombine, we import  
84 information (e.g. title of associated paper and sequence length) about relevant accessions into a  
85 dataframe with the 'build\_GB\_dataframe' function. We then proceed to explore and clean up this  
86 information to make it comparable across studies, and thus allow us to merge data for the any given  
87 species and create comparable datasets for multiple species.

88 It should be noted that, although GenBank staff review all submissions to GenBank, and quality  
89 control checks are performed before release, there is no standardised format for entering descriptive  
90 information. As a result, features such as alternative abbreviations for gene names, deprecated  
91 species names, subspecies names, and simple misspellings are all common. When nomenclature  
92 does not match between entries, filtering a large database for comparable samples is complex so,  
93 the mtDNAcombine pipeline includes two functions ('standardise\_gene\_name',  
94 'standardise\_spp\_name') that allow the user to re-set common alternatives / errors in species and  
95 gene names to a chosen standard value.

96

97 **Avoiding duplicate sequence entries** – As BSP analysis draws information from haplotype frequency,  
98 it is important to try to avoid inclusion of duplicate entries because these can skew estimates of  
99 effective population size ( $N_e$ ) and alter the reconstructed timings of demographic events. Repeated  
100 entries for a single sample can come from multiple sources, for example, the NCBI Reference  
101 Sequence (RefSeq) project [14] aims to curate records and associated data, providing a set of  
102 reference standards. As these data are drawn from the International Nucleotide Sequence Database

103 Collaboration (INSDC, which consists of GenBank, the European Nucleotide Archive (ENA), and the  
104 DNA Data Bank of Japan (DDBJ)) databases, a basic search can recover two accessions for the same  
105 sample; the RefSeq accession and the source record(s). In this instance, the duplicates can be  
106 distinguished because all RefSeq records include an underscore (“\_”) in their accession number,  
107 while simple repository accessions never have this character. Our code (‘load\_accession\_list’  
108 function, called within ‘build\_GB\_dataframe’) will automatically (and silently) remove any RefSeq  
109 record if the original accession is also found to be present in the dataset; however, users should be  
110 aware that these exclusions are being made.

111 Duplications can also arise from re-uploaded / re-sequenced samples. This occurs most frequently  
112 when multiple studies sample a single museum specimen, though there are other scenarios which  
113 can lead to a single individual being sequenced by multiple studies. Re-sequenced samples are often  
114 hard to identify and recognising repeated use of published alternative ID numbers (such as specimen  
115 numbers) are sometimes the only indications that the same individual has been sequenced by  
116 multiple studies. Although an occasional duplicate entry in a moderate sample size of around 100  
117 sequences is unlikely to cause a significant skew in the recovered population history, authors should  
118 be conscious that this source of duplicate entry exists and needs to be avoided whenever possible.  
119 Unfortunately, there is no simple programmatic way to avoid it given the information provided in  
120 GenBank.

121

122 **Alignment** – After sequence data have been obtained, they must be aligned. A number of public  
123 domain software programs are available that can achieve this, including T-Coffee [15], MUSCLE  
124 [16,17] and MAFFT [18]. In mtDNAcombine, we chose to use ClustalW [19], implemented through  
125 the R package ‘msa’. [20]. Though BEAST can handle missing / ambiguous bases [21], we consider it  
126 best to use alignments without gaps or ambiguities. Whilst some insertions or deletions may be



127 genuine, when working with sequences from multiple sources, the data are likely to have been  
128 sequenced with different techniques to varying standards. Inclusion of basic sequencing errors could  
129 drive miscalculations in later analyses and the volume or type of errors will not be consistent across  
130 all studies, nor across all taxa. We therefore recommend that, to ensure consistent sequence quality,  
131 all sites with ambiguities, insertions, deletions and missing data should be removed. This is done  
132 automatically within the 'align\_and\_summarise' function in mtDNAcombine.

133

134 **Diagnostic plots** – Compiling data from multiple studies produces a series of known challenges which  
135 we tackle individually in the following sections. The 'align\_and\_summarise' function draws a series  
136 of key diagnostic plots for each species dataset being handled. These plots are designed to help the  
137 user quickly visualise the data, enabling rapid identification of any problems in the aligned data. If  
138 these diagnostic plots look problematic, it is then possible to return to the original input files and  
139 reevaluate the raw sequence data on a case-by-case basis. The user can then decide to proceed with  
140 the analysis, return to the pipeline with an edited set of samples, or choose to drop the dataset  
141 entirely if too many samples / studies have to be excluded.

142

143 **Sequence length** - For any group of studies there will be numerous reasons the samples were original  
144 collected and sequenced. Each project will have had, among other things, a different budget, time  
145 constraints, target area of the mitochondrial genome, and available sequencing technology, meaning  
146 that different lengths of the genome / target gene will have been sequenced. In some instances,  
147 only very short sections of the gene of interest will have been sequenced. If the number of base  
148 pairs (bp) is too low, the sample is unlikely to hold enough information to be informative for  
149 population demographic reconstruction. The 'align\_and\_summarise' function will drop individual  
150 accessions that are below a user-set threshold before processing the data. There can be no out-of-

151 the-box value for this 'minimal length' as the most appropriate size will vary with a wide range of  
152 factors such as the gene under investigation, mutation rate, absolute gene length, and the available  
153 sample size. However, excluding any samples that clearly hold insufficient information before  
154 aligning and cropping sequences to the maximum overlapping area prevents an excessive loss of  
155 information if one very short sequence were included.

156 Equally, above the minimal length that has been set, there can still be a wide variance in the number  
157 of base pairs, or region of the focal gene sequenced by different studies. Automatically cropping all  
158 the sequences to the maximum overlap length may result in the loss of a large amount of data  
159 unbeknownst to the user. Therefore, in order that the process of alignment and sequence trimming  
160 is transparent, one of the diagnostic plots mtDNACombine produces is a histogram showing the  
161 original variation in sequence length as well as the length of the trimmed, maximum overlap, dataset  
162 (Fig. 3, vignette section 'Diagnostic plots'). This plot flags instances where a large number of base  
163 pairs have been removed in order to include a shorter sequence. Sequence length versus sample size  
164 is a trade-off that individual users may want to weight differently depending on the data available.  
165 By presenting the information, mtDNACombine allows the user to go back, review, and revise the  
166 input data if they want.

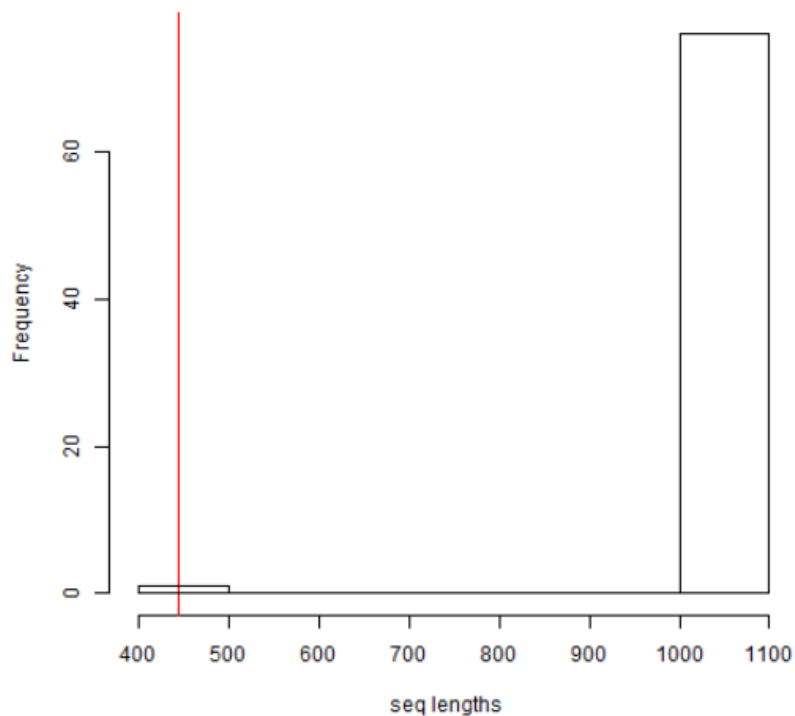

**Figure 3.** Example of diagnostic plot for sequence trimming in the 'align\_and\_summarise' function. Histogram shows that, in order to trim all sequences to the maximum overlapping length (red line), the majority of samples have had to be heavily cropped.

167 **Haplotype frequency** - Studies differ in the ways they deposit data. Some upload a single copy of  
168 each haplotype they found, while others upload sequences for each individual sampled. Datasets  
169 built exclusively of unique haplotypes are not suitable for a BSP analysis [22]. Where only unique  
170 haplotypes have been uploaded, it is vital to find the number of samples these haplotypes represent,  
171 or the study must be excluded. Routinely checking every source publication to see whether they  
172 uploaded only a single copy would be tedious and may become impractical for larger analyses. To  
173 guide this process, the 'align\_and\_summarise' function flags studies in which all haplotypes are  
174 unique (i.e. there are no replicates) as candidates for further investigation. A text file of individual  
175 accession numbers is also produced, including a column for the user to input new frequency  
176 information. Once satisfied that the sampled frequency for each haplotype has been recorded  
177 correctly within this document, the table can be read back into R, and the function

178 'magnify\_to\_sampled\_freq' will build the dataset up to correct sample sizes. See vignette section  
179 'Haplotype frequency' for a worked example.

180

181 **Population Structure** – Population sub-structure is known to cause problems for demographic  
182 reconstructions methods and BSP analysis is no exception [23–26]. BSP analysis, like other  
183 coalescent methods, is founded on the Wright-Fisher model and hence assumes panmixia [27]. This  
184 assumption is violated by population sub-structure [23,28], which acts to reduce the probability that  
185 lineages from different demes coalesce. In practice, depending on the sampling strategy employed,  
186 sub-structure can lead to inflated population size estimate in older parts of the reconstructed history  
187 but can also noticeably reduce apparent population size at the present [23]. Accurate demographic  
188 reconstruction therefore requires careful consideration of whether sub-structure is or might be  
189 present.

190 Once DNA sequences have been identified, downloaded, aligned, and multiplied up to sampled  
191 frequency, the level of population structure can be assessed. One of the most intuitive approaches is  
192 to visualise the haplotype network diagram for each dataset. To maintain a streamlined approach,  
193 we draw network diagrams within R using the package 'pegas' [29]. These network diagrams are one  
194 of the diagnostic plots created by the 'align\_and\_summarise' function (vignette section 'Network  
195 diagram').

196 Depending on the level of supplementary detail available for each sample, the decision to split a  
197 population for analysis can be simple. For example, in instances where sampling location data are  
198 available and clear geographic divisions coincide with major genetic clades, datasets can be  
199 separated and multiple sequence files handled as individual datasets. However, it is important not to  
200 over-split the data. Clades are a natural feature even of fully homogeneous populations, so if any  
201 obvious clades are removed, what is left will tend to be star-like haplotype clusters. Such clusters

202 will often yield a signal of population expansion which may or may not be real. Deciding if and where  
203 to divide datasets remains one of the more subjective and difficult challenges and it can be worth  
204 investing time into running data sub-sets to determine the impact of alternative splitting decisions.

205

206 **Outliers** – We frequently found instances of extreme outliers, single haplotypes that were separated  
207 from all others by many base changes. Such outliers may be genuine but equally may reflect  
208 immigrant individuals, sample mislabelling [30], amplification of integrated nuclear copies, incorrect  
209 accession codes, or even result from poor-quality sequencing. We feel that the benefits of including  
210 these outliers in case they are genuine are far outweighed by the risk that they distort the process of  
211 inference. We therefore recommend that outliers are identified and removed, although it is useful  
212 to retain copies of the original files so that the impact on inferred demographic histories can later be  
213 investigated if necessary. Within the ‘outliers\_dropped’ function, any “extreme outliers” are  
214 removed from the working dataset. We recognise that factors such as species life history, species  
215 population history, data availability, and data quality will influence the criteria for data inclusion.  
216 Therefore, the degree of separation from other haplotypes necessary for a sample to be classified as  
217 an “extreme outlier” is something that can be set by the user.

218

## 219 **Setting up and running BEAST**

220 **BEAST input** – In large comparative studies, as many steps as possible should be kept constant. This  
221 minimises the chance that the analysis becomes prohibitively time-consuming and helps to make the  
222 outputs as directly comparable as possible. The process of setting up and parameterising a BSP  
223 analysis in BEAST is well-described in several papers as well as in the accompanying textbook [21] so  
224 we will not go into detail here. Briefly, BEAST requires values for a range of parameters of which  
225 arguably the most important is mutation rate. Selection of an appropriate mutation rate is a

226 persistent problem in genetic studies. With BSP analyses, mutation rate influences the scaling of  
227 both inferred population size and timing of events, but it does not affect the overall profile shape.  
228 Both the mutation rate itself and its associated confidence will vary between taxa and it is necessary  
229 for the user to consider how best to standardise this to maximise consistency across profiles. For  
230 certain groups, attempts have been made to provide rates for a large number of taxa [31], though  
231 this kind of resource is far from universal as yet.

232 To maximise the probability that a given run converges, it can be a good idea to use fairly tight  
233 constraints on initialising parameters such as the number of population size changes. This decision  
234 will be study-specific with no one-size-fits-all approach. Moreover, changing priors and parameter  
235 values can alter outputs and should be done in accordance with best Bayesian practices [21]. Bearing  
236 this in mind, we suggest that a loss of resolution in some profiles may be a necessary trade-off if the  
237 maximum number of species is to be included.

238 The mtDNACombine package function 'setup\_basic\_xml' utilises the 'babette' package [32] to build  
239 basic XML files from the data set processed earlier in the pipeline. The skeleton XML files will need  
240 editing (e.g. defining mutation rate, model choice, output names) but their creation minimises the  
241 number of steps the user needs to perform manually, speeding up the process and reducing the  
242 opportunity for the introduction of human error. Once parameterisation decisions have been made  
243 and the XML input files finalised, whenever possible, we encourage use of the BEAGLE library [33]  
244 when running BEAST2, since this can significantly improve the speed of a run.

245

246 **BEAST output** – Interpretation of BEAST outputs has been covered well in the literature e.g. [22,23]  
247 and by those who designed and built the software [34–38]. As with any statistical model, checks  
248 need to be done to confirm the reliability of the output. In BEAST2 these are generally undertaken  
249 using the software package Tracer [39] and focus on appropriate convergence of the Markov chain.

250 As a rule of thumb, outputs should be treated with caution wherever the effective sample sizes (ESS)  
251 for a given parameter drops below 200. Similarly, duplicate runs should be used to confirm that the  
252 posterior probability distributions stabilise at similar values. Whilst ESS values can be captured  
253 directly through the package ‘babette’ [32], we think that a visual inspection of each run in Tracer is  
254 best practice. Whilst doing so, it is then possible to export extensive summary data from the  
255 ‘Bayesian Skyline Reconstruction’ tab (found under ‘Analysis’ in Tracer). These Tracer exports are  
256 detailed, informative, and concise to work from, ideal for tasks such as downstream data  
257 visualisation as we do in mtDNAcombine.

258

259 **Plotting profiles in R** – BSPs can be drawn using the programme Tracer [39]. However, for more  
260 flexibility, and to facilitate exploration of the profiles in greater detail, we chose to visualise the  
261 reconstructed profiles in R. Within the mtDNAcombine package vignette, we present example code  
262 for plotting Tracer output data as BSP profiles (section ‘Exploring outputs’). However, it is  
263 anticipated that data presentation will be highly project specific, therefore this code is not tied up in  
264 functions, enabling easy editing and adaptation by the user.

265

266 **Cautions** – Skyline plots offer a powerful tool set but are easily over-interpreted. Although covered  
267 in several recent reviews [22,40], over-interpretation continues to be an issue and hence its dangers  
268 are worth re-iterating. Unsurprisingly, problems are greatest with weaker data: smaller sample sizes,  
269 uneven sampling strategy, and / or when drawn from a species with strong population substructure  
270 [22,23]. For example, an investigation of the same species, the common rosefinch, based on two  
271 mtDNA datasets with very different sample sizes gives us contrasting results (Fig. 4.). The smaller  
272 sample set, cytb, suggest a weak linear increase in size over time but the larger dataset, ND2,

273 uncover a rapid, almost 100-fold increase in size. This clearly indicates that interpretation of BSP  
274 plots must be done with appropriate consideration for the data quality.

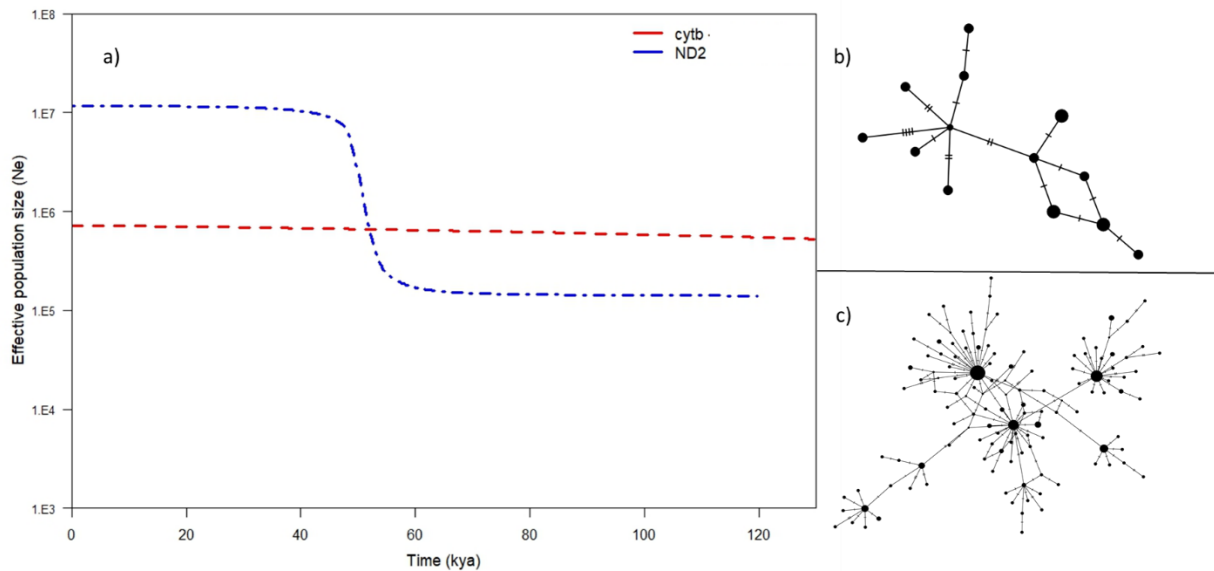

**Figure 4.** Comparison of two dissimilar BSP profiles drawn from different mtDNA datasets of the common rosefinch. a) Red line is median value for cytb BSP profile, blue line is median value for ND2 BSP profile. The cytb dataset includes 15 samples, ND2 dataset 190 samples. The varying levels of information available for inferences to be drawn from are clearly shown in b) the median joining network (MJN) for cytb dataset, and c) MJN for ND2 dataset.

275 **Uploading sequence data** – When assembling large annotated DNA databases using published data,  
276 many sequences are ‘lost’ due to inaccuracies or inconsistencies in how the data are uploaded to  
277 repositories. Unless the accession process becomes more standardised, idiosyncrasies and errors will  
278 continue to render an appreciable proportion of the potential data unusable. We therefore  
279 encourage people who wish to upload data to take the time to complete as many supplementary  
280 fields as possible and to be sure they undertake basic formatting checks such spell-checks, correct  
281 capitalisation and use of standard abbreviations. Where accompanying information is not uploaded  
282 to repositories, we urge authors to make this information easily accessible to readers. For example,  
283 downstream use will be facilitated by providing haplotype frequency data or detailed sampling



284 location data as supplementary files (ideally well formatted text files which are easy to process)  
285 rather than embedded tables or images within manuscripts.

## 286 **Conclusions**

287 With the exponentially expanding volume of data in public DNA sequence repositories, there is now  
288 more genetic information available than ever before. Building large meta-data sets by combining  
289 existing data offers the opportunity to explore new and exciting avenues of research e.g. [41–43].  
290 However, compiling multi-study datasets still remains a technically challenging prospect. Unknown  
291 sequence quality, little to no control over sampling structure, potential errors in species  
292 identification, and limited control of sample size are all factors that can negatively affect a  
293 comparative study if not carefully handled.

294 Here we present the mtDNACombine package, providing a pipeline to streamline the process of  
295 downloading, curating and analysing mitochondrial sequence data (Fig. 2). At the moment, the lack  
296 of standardisation in the data upload process exacerbates the inevitable complexities of combining  
297 data from multiple origins. Whilst some samples, sequenced early in the molecular era, are  
298 allowably poorly documented we urge people to be careful when uploading data today. The more  
299 information about a sample that is included online, alongside sequence data, the more likely that  
300 sequence will be usable by others. Equally, with the volume of data available today the accuracy of  
301 associated meta-data and sequence tags / labels is vital for ensuring the data are retrievable when  
302 broad, automated, searches are used. We suggest that a focus on quality control for additional  
303 information about each sample will make a noticeable difference to the ease with which public  
304 databases can be mined for relevant information and this exceptional resource exploited. We hope  
305 that our discussion, whilst highlighting common pitfalls, provides solutions and suggestions to guide  
306 the process of compiling data sets from online databases.

307 **Funding:**

308 E.F.M was supported by the Biotechnology and Biological Sciences Research Council (BBSRC)  
309 Doctoral Training Partnerships program (grant code: BB/M011194/1).

310 **Data Availability:**

311 mtDNAcombine source code and full vignette can be found at:

312 <https://github.com/EvolEcolGroup/mtDNAcombine> . The data used as examples in this paper were

313 derived from publicly available data in GenBank (<https://www.ncbi.nlm.nih.gov/genbank/>). A sample

314 dataset is available within the R package.

315 **Author contributions:**

316 E.F.M. performed the analyses, prepared all figures and wrote the manuscript. All authors

317 conceived the idea and design, as well as reviewing the manuscript.

318 **Additional information:**

319 The authors declare no competing financial interests.

- 320 1. Nadachowski A. 1989 Origin and History of the Present Rodent Fauna in Poland Based on  
321 Fossil Evidence. *Acta Theriol. (Warsz)*. **34**.
- 322 2. Sommer RS, Benecke N. 2005 The recolonization of Europe by brown bears *Ursus arctos*  
323 Linnaeus, 1758 after the Last Glacial Maximum. *Mamm. Rev.* **35**, 156–164.  
324 (doi:10.1111/j.1365-2907.2005.00063.x)
- 325 3. Sommer R, Benecke N. 2005 Late-Pleistocene and early Holocene history of the canid fauna of  
326 Europe (Canidae). *Mamm. Biol.* **70**, 227–241. (doi:10.1016/j.mambio.2004.12.001)
- 327 4. Brown WM, George M, Wilson AC. 1979 Rapid evolution of animal mitochondrial DNA. *Annu.*  
328 *Rev. Ecol. Syst.* **18**, 269–292. (doi:10.1146/annurev.es.18.110187.001413)
- 329 5. Elson JL, Andrews RM, Chinnery PF, Lightowlers RN, Turnbull DM, Howell N. 2002 Analysis of  
330 European mtDNAs for Recombination. *Am. J. Hum. Genet.* **68**, 145–153. (doi:10.1086/316938)
- 331 6. Giles RE, Blanc H, Cann HM, Wallace DC. 1980 Maternal inheritance of human mitochondrial  
332 DNA. *Proc. Natl. Acad. Sci. U. S. A.* **77**, 6715–9.
- 333 7. Zink RM, Barrowclough GF. 2008 Mitochondrial DNA under siege in avian phylogeography.  
334 *Mol. Ecol.* **17**, 2107–2121. (doi:10.1111/j.1365-294X.2008.03737.x)
- 335 8. Drummond AJ, Rambaut A, Shapiro B, Pybus OG. 2005 Bayesian coalescent inference of past  
336 population dynamics from molecular sequences. *Mol. Biol. Evol.* **22**, 1185–1192.  
337 (doi:10.1093/molbev/msi103)
- 338 9. Zhang G. 2015 Genomics: Bird sequencing project takes off. *Nature* **522**, 34.  
339 (doi:10.1038/522034d)
- 340 10. Li H, Durbin R. 2011 Inference of human population history from individual whole-genome  
341 sequences. *Nature* **475**, 493–496. (doi:10.1038/nature10231)

- 342 11. Schiffels S, Durbin R. 2014 Inferring human population size and separation history from  
343 multiple genome sequences. *Nat. Publ. Gr.* **46**, 919–925. (doi:10.1038/ng.3015)
- 344 12. Garrick RC *et al.* 2015 The evolution of phylogeographic data sets. *Mol. Ecol.* **24**, 1164–1171.  
345 (doi:10.1111/mec.13108)
- 346 13. Benson DA, Cavanaugh M, Clark K, Karsch-Mizrachi I, Lipman DJ, Ostell J, Sayers EW. 2013  
347 GenBank. *Nucleic Acids Res.* **41**, 36–42. (doi:10.1093/nar/gks1195)
- 348 14. O’Leary NA *et al.* 2016 Reference sequence (RefSeq) database at NCBI: Current status,  
349 taxonomic expansion, and functional annotation. *Nucleic Acids Res.* **44**, D733–D745.  
350 (doi:10.1093/nar/gkv1189)
- 351 15. Notredame C, Higgins DG, Heringa J. 2000 T-coffee: A novel method for fast and accurate  
352 multiple sequence alignment. *J. Mol. Biol.* **302**, 205–217. (doi:10.1006/jmbi.2000.4042)
- 353 16. Edgar RC. 2004 MUSCLE: Multiple sequence alignment with high accuracy and high  
354 throughput. *Nucleic Acids Res.* **32**, 1792–1797. (doi:10.1093/nar/gkh340)
- 355 17. Edgar RC. 2004 MUSCLE: A multiple sequence alignment method with reduced time and space  
356 complexity. *BMC Bioinformatics* **5**, 1–19. (doi:10.1186/1471-2105-5-113)
- 357 18. Katoh K, Misawa K, Kuma K, Miyata T. 2002 MAFFT: a novel method for rapid multiple  
358 sequence alignment based on fast Fourier transform. *Nucleic Acids Res.* **30**, 3059–3066.  
359 (doi:10.1093/nar/gkf436)
- 360 19. Larkin MA *et al.* 2007 Clustal W and Clustal X version 2.0. *Bioinformatics* **23**, 2947–2948.  
361 (doi:10.1093/bioinformatics/btm404)
- 362 20. Bodenhofer U, Bonatesta E, Horejš-Kainrath C, Hochreiter S. 2015 Msa: An R package for  
363 multiple sequence alignment. *Bioinformatics* **31**, 3997–3999.

- 364 (doi:10.1093/bioinformatics/btv494)
- 365 21. Drummond AJ, Bouckaert RR. 2015 *Bayesian evolutionary analysis with BEAST*. Cambridge  
366 University Press.
- 367 22. Grant WS. 2015 Problems and cautions with sequence mismatch analysis and Bayesian skyline  
368 plots to infer historical demography. *J. Hered.* **106**, 333–346. (doi:10.1093/jhered/esv020)
- 369 23. Heller R, Chikhi L, Siegmund HR. 2013 The Confounding Effect of Population Structure on  
370 Bayesian Skyline Plot Inferences of Demographic History. *PLoS One* **8**, e62992.  
371 (doi:10.1371/journal.pone.0062992)
- 372 24. Chikhi L, Sousa VC, Luisi P, Goossens B, Beaumont MA. 2010 The confounding effects of  
373 population structure, genetic diversity and the sampling scheme on the detection and  
374 quantification of population size changes. *Genetics* **186**, 983–995.  
375 (doi:10.1534/genetics.110.118661)
- 376 25. Städler T, Haubold B, Merino C, Stephan W, Pfaffelhuber P. 2009 The impact of sampling  
377 schemes on the site frequency spectrum in nonequilibrium subdivided populations. *Genetics*  
378 **182**, 205–216. (doi:10.1534/genetics.108.094904)
- 379 26. Pannell JR. 2003 Coalescence in a Metapopulation with Recurrent Local Extinction and  
380 Recolonization. **57**, 949–961.
- 381 27. Pybus OG, Rambaut A, Harvey PH. 2000 An integrated framework for the inference of viral  
382 population history from reconstructed genealogies. *Genetics* **155**, 1429–37.
- 383 28. Ho SYW, Shapiro B. 2011 Skyline-plot methods for estimating demographic history from  
384 nucleotide sequences. *Mol. Ecol. Resour.* **11**, 423–434. (doi:10.1111/j.1755-  
385 0998.2011.02988.x)

- 386 29. Paradis E. 2010 Pegas: An R package for population genetics with an integrated-modular  
387 approach. *Bioinformatics* **26**, 419–420. (doi:10.1093/bioinformatics/btp696)
- 388 30. McMahon MM, Sanderson MJ. 2006 Phylogenetic supermatrix analysis of GenBank sequences  
389 from 2228 papilionoid legumes. *Syst. Biol.* **55**, 818–836. (doi:10.1080/10635150600999150)
- 390 31. Nabholz B, Lanfear R, Fuchs J. 2016 Body mass-corrected molecular rate for bird  
391 mitochondrial DNA. *Mol. Ecol.* **25**, 4438–4449. (doi:10.1111/mec.13780)
- 392 32. Bilderbeek RJC, Etienne RS. 2018 babette : BEAUti 2, BEAST2 and Tracer for R. *Methods Ecol.*  
393 *Evol.* **9**, 2034–2040. (doi:10.1111/2041-210X.13032)
- 394 33. Ayres DL *et al.* 2012 BEAGLE: An Application Programming Interface and High-Performance  
395 Computing Library for Statistical Phylogenetics. *Syst. Biol.* **61**, 170–173.  
396 (doi:10.1093/sysbio/syr100)
- 397 34. Atkinson QD, Gray RD, Drummond AJ. 2007 mtDNA Variation Predicts Population Size in  
398 Humans and Reveals a Major Southern Asian Chapter in Human Prehistory.  
399 (doi:10.1093/molbev/msm277)
- 400 35. Drummond AJ, Rambaut A. 2007 BEAST : Bayesian evolutionary analysis by sampling trees. **8**,  
401 1–8. (doi:10.1186/1471-2148-7-214)
- 402 36. Heled J, Drummond AJ. 2008 Bayesian inference of population size history from multiple loci.  
403 **15**, 1–15. (doi:10.1186/1471-2148-8-289)
- 404 37. Drummond AJ, Suchard MA, Xie D, Rambaut A. 2012 Bayesian phylogenetics with BEAUti and  
405 the BEAST 1.7. *Mol. Biol. Evol.* **29**, 1969–1973. (doi:10.1093/molbev/mss075)
- 406 38. Bouckaert R, Heled J, Kühnert D, Vaughan T, Wu CH, Xie D, Suchard MA, Rambaut A,  
407 Drummond AJ. 2014 BEAST 2: A Software Platform for Bayesian Evolutionary Analysis. *PLoS*

- 408            *Comput. Biol.* **10**, 1–6. (doi:10.1371/journal.pcbi.1003537)
- 409    39.    Rambaut A, Suchard MA, Xie D, Drummond AJ. In press. Tracer v1.6.
- 410    40.    Grant WS, Liu M, Gao T, Yanagimoto T. 2012 Limits of Bayesian skyline plot analysis of mtDNA  
411            sequences to infer historical demographies in Pacific herring (and other species). *Mol.*  
412            *Phylogenet. Evol.* **65**, 203–212. (doi:10.1016/j.ympev.2012.06.006)
- 413    41.    Hope AG, Ho SYW, Malaney JL, Cook JA, Talbot SL. 2014 Accounting for rate variation among  
414            lineages in comparative demographic analyses. *Evolution (N. Y.)*. **68**, 2689–2700.  
415            (doi:10.1111/evo.12469)
- 416    42.    Antonelli A *et al.* 2017 Toward a self-updating platform for estimating rates of speciation and  
417            migration, ages, and relationships of Taxa. *Syst. Biol.* **66**, 153–166.  
418            (doi:10.1093/sysbio/syw066)
- 419    43.    Smith SA, Beaulieu JM, Donoghue MJ. 2009 Mega-phylogeny approach for comparative  
420            biology: an alternative to supertree and supermatrix approaches. *BMC Evol. Biol.* **9**, 37.  
421            (doi:10.1186/1471-2148-9-37)
